# Supplementary material for: Bioethanol Production from Cellulose-Rich Corncob Residue by the Thermotolerant Saccharomyces cerevisiae TC-5
Source: MDPI journal article supplement (doi:10.3390/jof7070547), 2021-07-09
Supplement: s1 [file s1]

## Supplementary Data

Journal name: Journal of Fungi

### **Bioethanol Production from Cellulose-rich Corncob Residue by the Thermotolerant *Saccharomyces cerevisiae* TC-5**

Pinpanit Boonchuay<sup>1</sup>, Charin Techapun<sup>1</sup>, Noppol Leksawasdi<sup>2</sup>, Phisit Seesuriyachan<sup>1</sup>, Prasert Hanmoungjai<sup>1</sup>, Masanori Watanabe<sup>3</sup>, Siraprapa Srisupa<sup>1</sup>, and Thanongsak Chaiyaso<sup>1\*</sup>

<sup>1</sup>Division of Biotechnology, Faculty of Agro-Industry, Chiang Mai University, Chiang Mai 50100, Thailand

<sup>2</sup>Division of Food Engineering, Faculty of Agro-Industry, Chiang Mai University, Chiang Mai 50100, Thailand

<sup>3</sup>Department of Food, Life and Environmental Sciences, Faculty of Agriculture, Yamagata University, Tsuruoka, Yamagata 9978555, Japan

\* Corresponding author at: Division of Biotechnology, Faculty of Agro-Industry, Chiang Mai University, Chiang Mai 50100, Thailand

Tel: +66 5394 8262, Fax: +66 5394 8219

✉ thachaiyaso@hotmail.com; thanongsak.c@cmu.ac.th (T. Chaiyaso)

**Table S1** Comparison of ethanol concentration, ethanol yield, ethanol productivity, and theoretical ethanol yield produced by commercial *S. cerevisiae* (control) and the thermotolerant *S. cerevisiae* TC-5 via separate hydrolysis and fermentation (SHF), simultaneous saccharification and fermentation (SSF), and prehydrolysis-simultaneous saccharification and fermentation (pre-SSF) at 35, 37, 40, and 42°C at 72 h of fermentation time.

| Temperature (°C)                                                    | Strains                         | C <sub>EtOH</sub> <sup>*</sup> (g/L) | Y <sub>p/s</sub> <sup>**</sup> (gEtOH/g <sub>glucose</sub> ) | Q <sub>P</sub> <sup>***</sup> (g/L/h) | Y <sup>****</sup> (%) |
|---------------------------------------------------------------------|---------------------------------|--------------------------------------|--------------------------------------------------------------|---------------------------------------|-----------------------|
| <b>Separate hydrolysis and fermentation (SHF) process</b>           |                                 |                                      |                                                              |                                       |                       |
| 35                                                                  | Commercial <i>S. cerevisiae</i> | 20.59±0.35                           | 0.378±0.000                                                  | 0.123±0.001                           | 79.01±0.32            |
|                                                                     | <i>S. cerevisiae</i> TC-5       | 20.33±0.92                           | 0.373±0.021                                                  | 0.121±0.005                           | 78.01±3.33            |
| 37                                                                  | Commercial <i>S. cerevisiae</i> | 19.09±0.11                           | 0.351±0.000                                                  | 0.114±0.001                           | 73.25±0.41            |
|                                                                     | <i>S. cerevisiae</i> TC-5       | 21.64±1.06                           | 0.397±0.022                                                  | 0.129±0.006                           | 83.04±3.68            |
| 40                                                                  | Commercial <i>S. cerevisiae</i> | 12.42±1.08                           | 0.228±0.021                                                  | 0.074±0.006                           | 47.66±3.93            |
|                                                                     | <i>S. cerevisiae</i> TC-5       | 20.50±0.68                           | 0.376±0.014                                                  | 0.122±0.004                           | 78.66±2.47            |
| 42                                                                  | Commercial <i>S. cerevisiae</i> | 9.81±0.44                            | 0.180±0.014                                                  | 0.058±0.002                           | 37.64±1.61            |
|                                                                     | <i>S. cerevisiae</i> TC-5       | 18.39±0.35                           | 0.338±0.007                                                  | 0.109±0.002                           | 70.57±1.25            |
| <b>Simultaneous saccharification and fermentation (SSF) process</b> |                                 |                                      |                                                              |                                       |                       |
| 35                                                                  | Commercial <i>S. cerevisiae</i> | 17.58±0.52                           | 0.323±0.007                                                  | 0.244±0.007                           | 67.46±1.89            |
|                                                                     | <i>S. cerevisiae</i> TC-5       | 20.69±0.61                           | 0.380±0.014                                                  | 0.287±0.008                           | 79.39±2.21            |

| Temperature (°C)                                                                      | Strains                         | C <sub>EtOH</sub> <sup>*</sup> (g/L) | Y <sub>p/s</sub> <sup>**</sup> (gEtOH/gglucose) | Q <sub>P</sub> <sup>***</sup> (g/L/h) | Y <sup>****</sup> (%) |
|---------------------------------------------------------------------------------------|---------------------------------|--------------------------------------|-------------------------------------------------|---------------------------------------|-----------------------|
| 37                                                                                    | Commercial <i>S. cerevisiae</i> | 16.58±0.04                           | 0.304±0.000                                     | 0.230±0.001                           | 63.62±0.13            |
|                                                                                       | <i>S. cerevisiae</i> TC-5       | 20.73±0.25                           | 0.381±0.000                                     | 0.288±0.004                           | 79.54±0.93            |
| 40                                                                                    | Commercial <i>S. cerevisiae</i> | 12.81±0.78                           | 0.235±0.014                                     | 0.178±0.011                           | 49.15±2.82            |
|                                                                                       | <i>S. cerevisiae</i> TC-5       | 20.92±0.34                           | 0.384±0.003                                     | 0.291±0.002                           | 80.27±1.23            |
| 42                                                                                    | Commercial <i>S. cerevisiae</i> | 7.45±0.40                            | 0.137±0.007                                     | 0.103±0.006                           | 28.59±1.46            |
|                                                                                       | <i>S. cerevisiae</i> TC-5       | 20.02±0.37                           | 0.368±0.007                                     | 0.278±0.006                           | 76.82±1.33            |
| <b>Prehydrolysis-simultaneous saccharification and fermentation (pre-SSF) process</b> |                                 |                                      |                                                 |                                       |                       |
| 35                                                                                    | Commercial <i>S. cerevisiae</i> | 20.71±0.06                           | 0.380±0.000                                     | 0.216±0.011                           | 79.47±0.23            |
|                                                                                       | <i>S. cerevisiae</i> TC-5       | 20.10±0.61                           | 0.370±0.014                                     | 0.209±0.006                           | 77.13±2.21            |
| 37                                                                                    | Commercial <i>S. cerevisiae</i> | 20.19±1.04                           | 0.370±0.014                                     | 0.211±0.011                           | 77.49±3.76            |
|                                                                                       | <i>S. cerevisiae</i> TC-5       | 20.13±0.04                           | 0.370±0.000                                     | 0.210±0.007                           | 77.24±0.16            |
| 40                                                                                    | Commercial <i>S. cerevisiae</i> | 12.15±0.45                           | 0.220±0.000                                     | 0.127±0.00                            | 46.62±0.25            |
|                                                                                       | <i>S. cerevisiae</i> TC-5       | 20.89±0.44                           | 0.385±0.007                                     | 0.218±0.005                           | 80.16±1.61            |
| 42                                                                                    | Commercial <i>S. cerevisiae</i> | 8.24±0.01                            | 0.150±0.000                                     | 0.086±0.000                           | 31.62±0.05            |
|                                                                                       | <i>S. cerevisiae</i> TC-5       | 19.91±0.22                           | 0.365±0.007                                     | 0.207±0.002                           | 76.40±0.80            |

**Note:** Values are presented as mean  $\pm$  standard deviation.  $^*C_{\text{EtOH}}$ : ethanol concentration;  $Y_{\text{p/s}}^{**}$ : ethanol yield;  $Q_{\text{P}}^{***}$ : ethanol productivity;  $Y^{****}$ : theoretical ethanol yield.

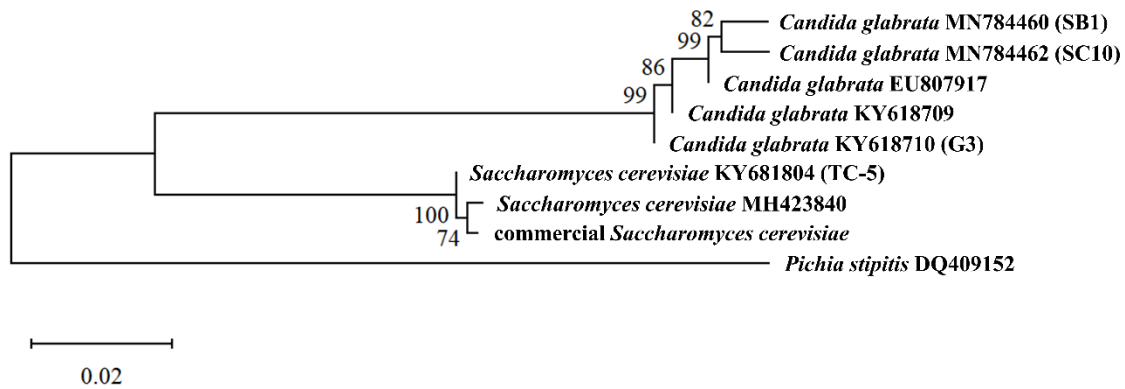

**Figure S1** Phylogenetic tree of the *S. cerevisiae* (commercial strain, Danstil, Lallemand Inc., Denmark), thermotolerant *S. cerevisiae* TC-5, *C. glabrata* SB1, *C. glabrata* SC10, *C. glabrata* G3, and the related species in GenBank database.

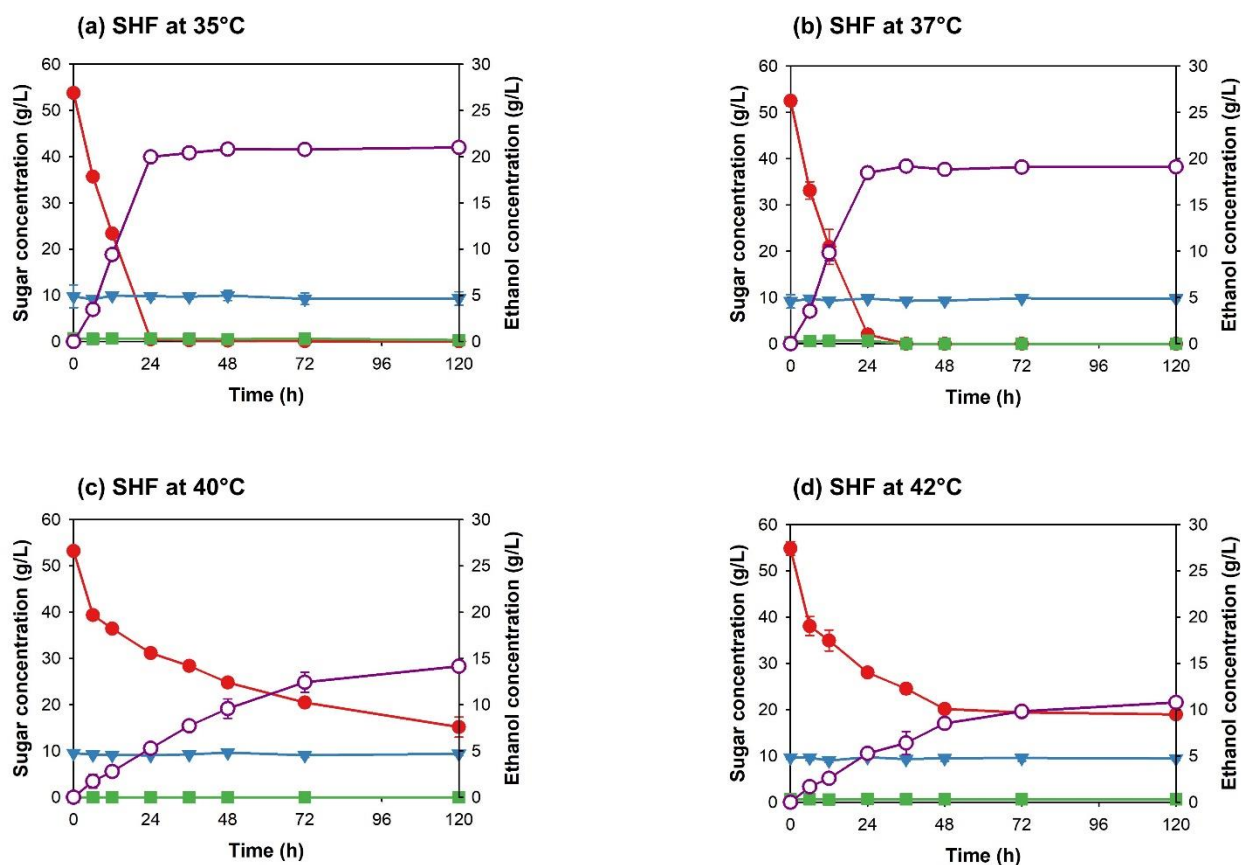

**Figure S2** Time course of ethanol production from cellulose-rich corncob hydrolysate by commercial *S. cerevisiae* via separate hydrolysis and fermentation (SHF) process at 35 (a), 37 (b), 40 (c), and 42°C (d).

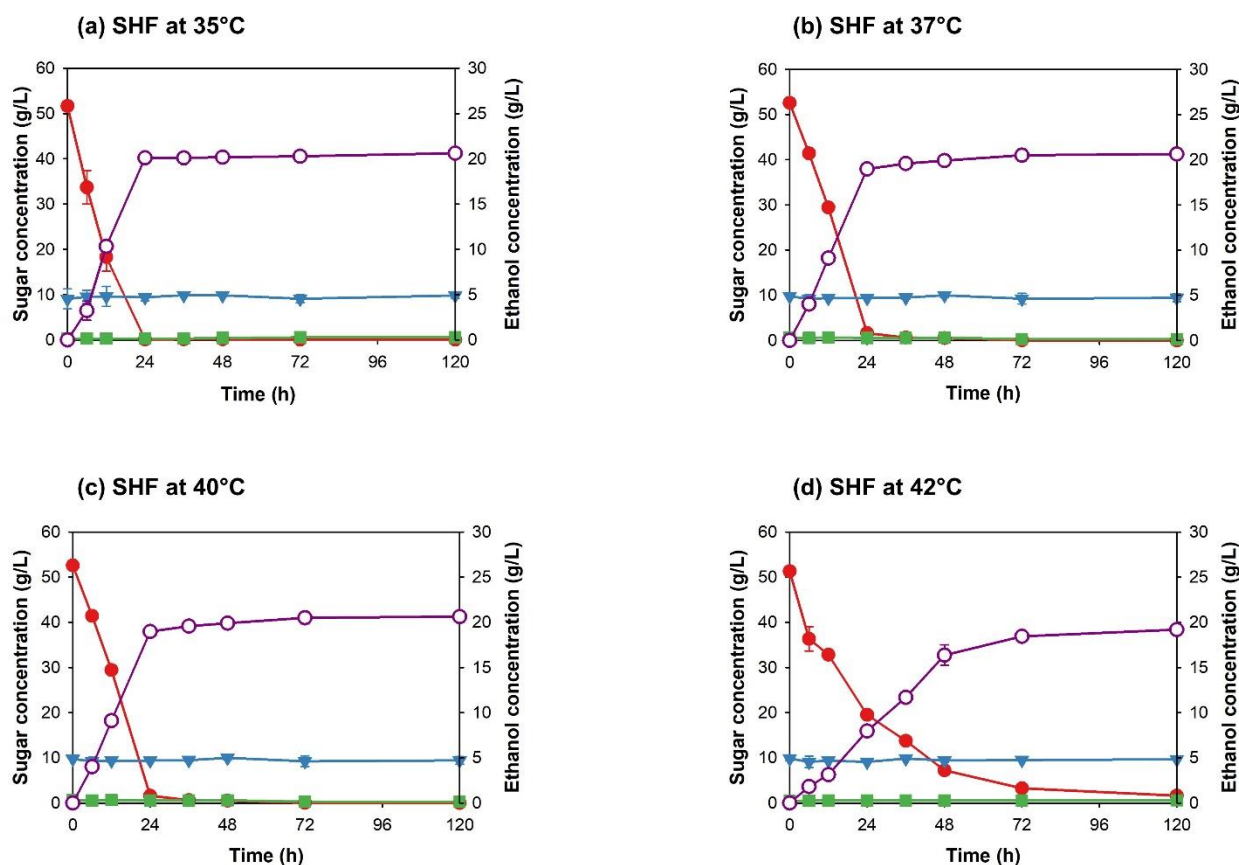

**Figure S3** Time course of ethanol production from cellulose-rich corncob hydrolysate by *S. cerevisiae* TC-5 via separate hydrolysis and fermentation (SHF) process at 35 (a), 37 (b), 40 (c), and 42°C (d).

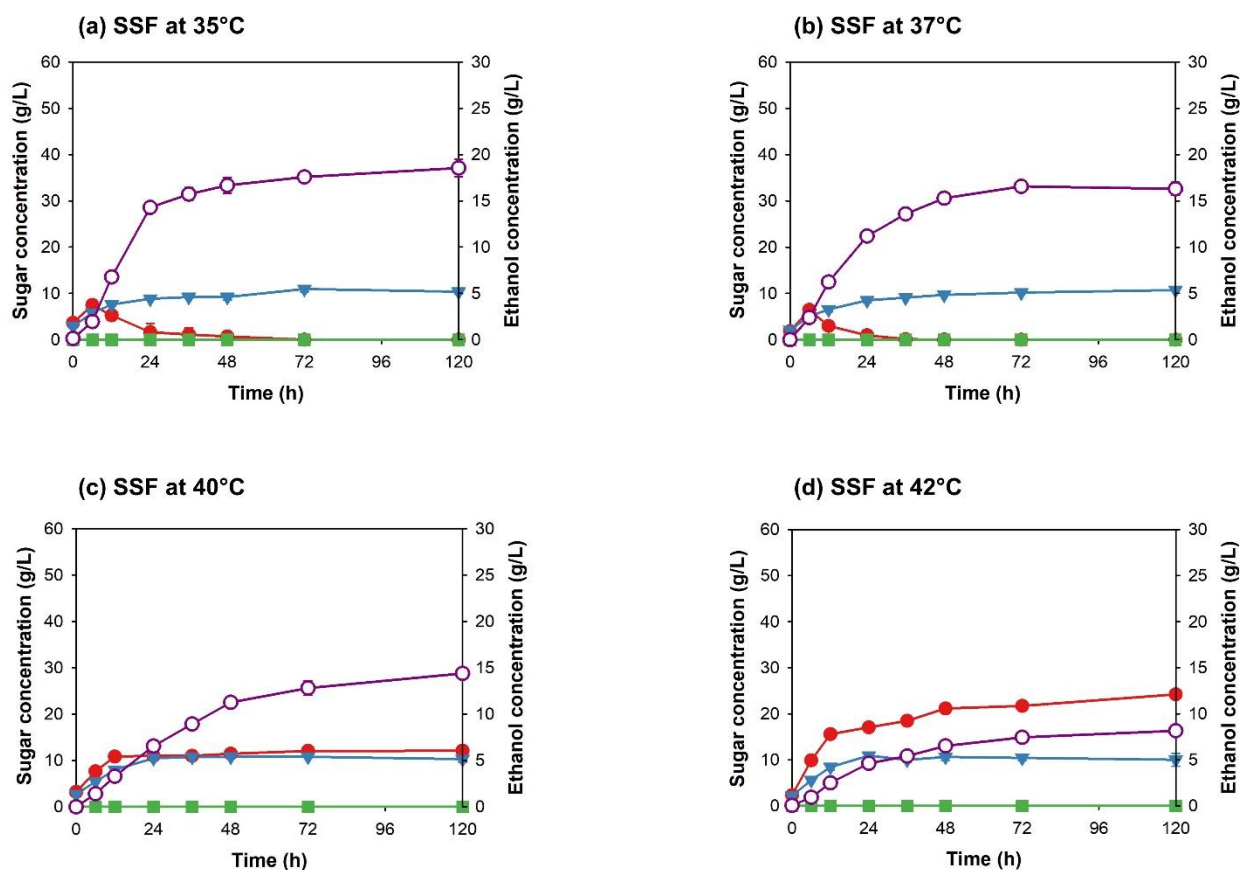

**Figure S4** Time course of ethanol production from cellulose-rich corncob residue by commercial *S. cerevisiae* via simultaneous saccharification and fermentation (SSF) process at 35 (a), 37 (b), 40 (c), and 42°C (d).



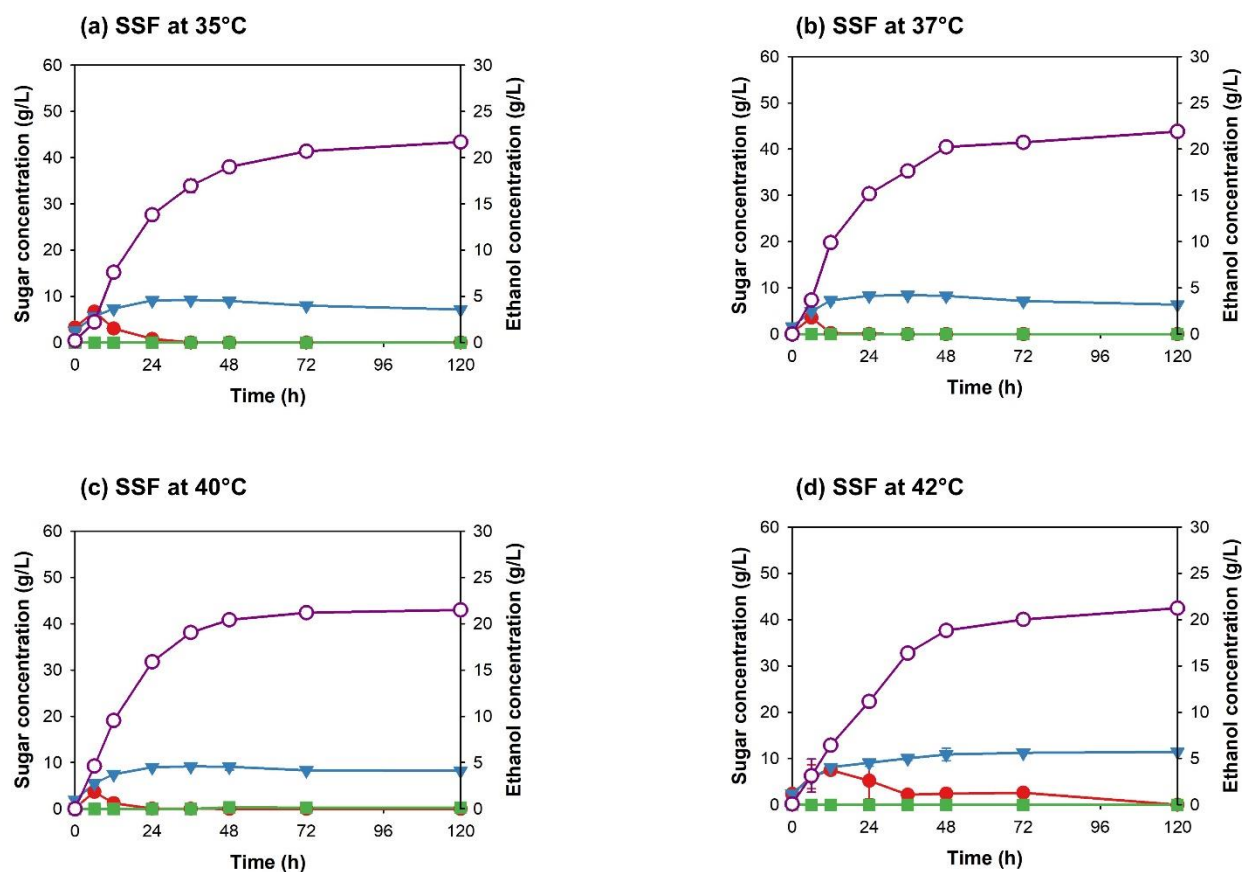

**Figure S5** Time course of ethanol production from cellulose-rich corncob residue by *S. cerevisiae* TC-5 via simultaneous saccharification and fermentation (SSF) process at 35 (a), 37 (b), 40 (c), and 42°C (d).

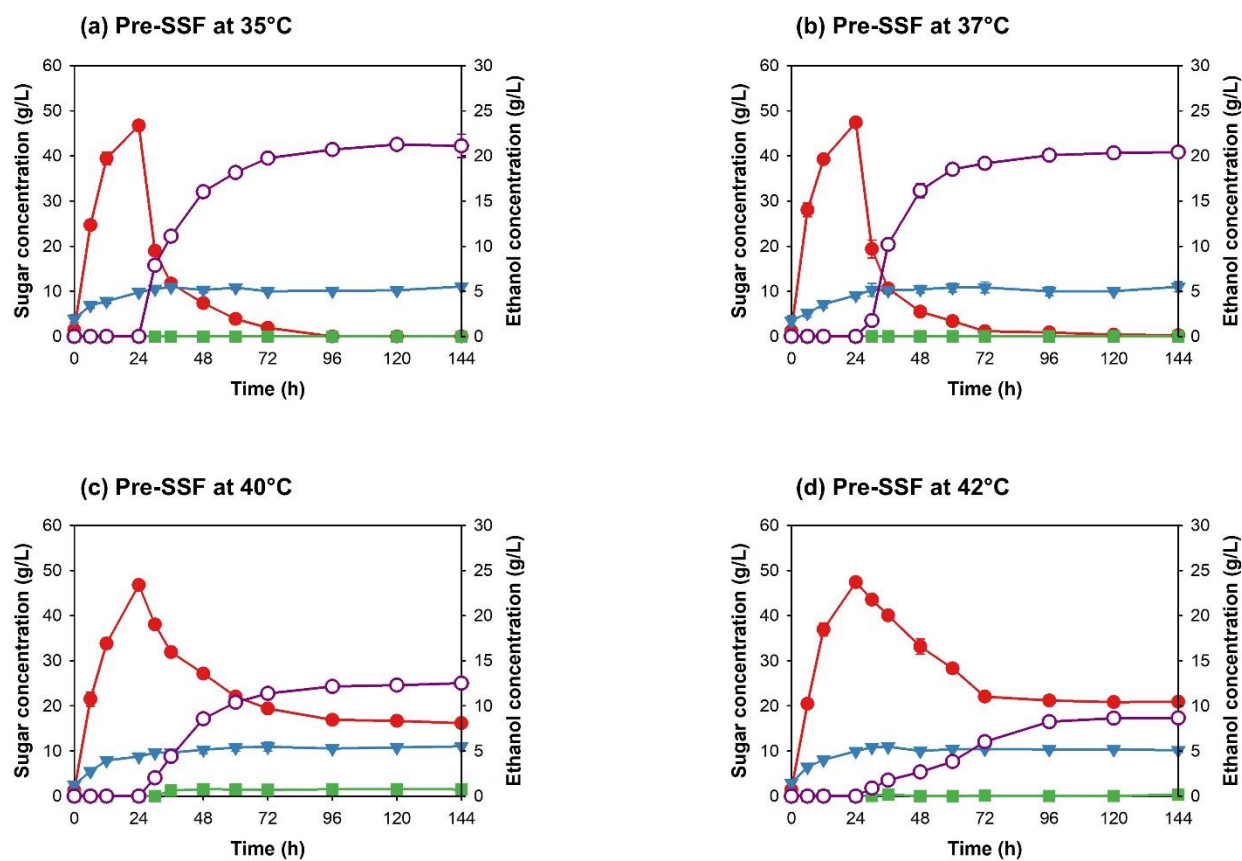

**Figure S6** Time course of ethanol production from cellulose-rich corncob residue by commercial *S. cerevisiae* via prehydrolysis-simultaneous saccharification and fermentation (pre-SSF) process at 35 (a), 37 (b), 40 (c), and 42°C (d).

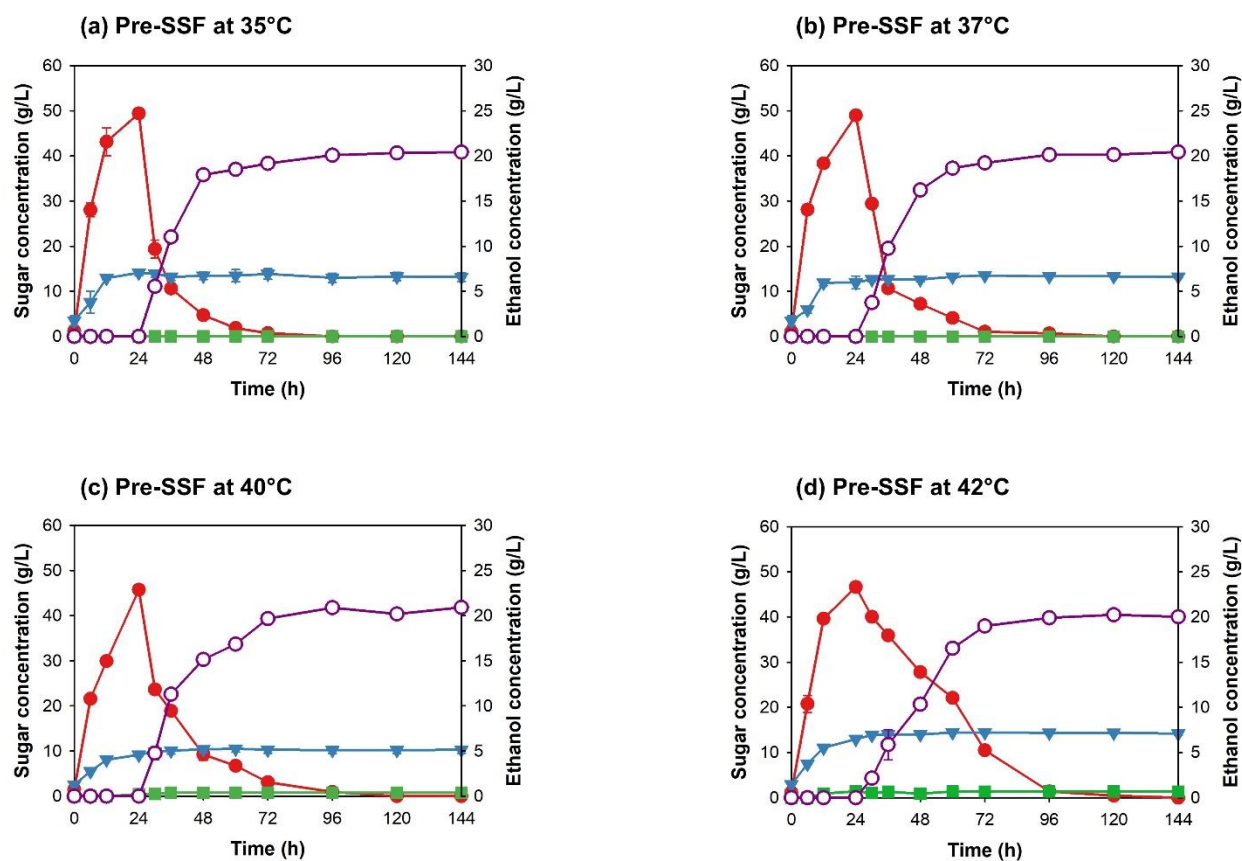

**Figure S7** Time course of ethanol production from cellulose-rich corncob residue by *S. cerevisiae* TC-5 via prehydrolysis-simultaneous saccharification and fermentation (pre-SSF) process at 35 (a), 37 (b), 40 (c), and 42°C (d).
